# Supplementary material for: Serum neurofilament light at diagnosis: a prognostic indicator for accelerated disease progression in Parkinson’s Disease
Source: PubMed Central journal article supplement (PMC11336184; doi:10.1038/s41531-024-00768-1), 2024-08-21
Supplement: 41531_2024_768_MOESM1_ESM.pdf [file 41531_2024_768_MOESM1_ESM.pdf]

## Supplementary Information

|          | Overall                      | MMSE                         | UPDRS III    | NFL                          |
|----------|------------------------------|------------------------------|--------------|------------------------------|
| Baseline | 190 Patients<br>202 Controls | 190 Patients<br>202 Controls | 190 Patients | 172 Patients<br>194 Controls |
| Year 1   | 184 Patients<br>191 Controls | 183 Patients<br>191 Controls | 184 Patients |                              |
| Year 3   | 172 Patients<br>178 Controls | 168 Patients<br>178 Controls | 172 Patients | 146 Patients<br>144 Controls |
| Year 5   | 157 Patients<br>162 Controls | 151 Patients<br>162 Controls | 157 Patients | 137 Patients<br>150 Controls |
| Year 7   | 143 Patients<br>150 Controls | 136 Patients<br>148 Controls | 143 Patients |                              |
| Year 9   | 125 Patients<br>139 Controls | 118 Patients<br>139 Controls | 125 Patients |                              |

**Supplementary Figure 1.** Flowchart of the number of study participants at each visit.

The overall attendance at each visit, and the number of participants assessed by The Mini Mental State Examination (MMSE) or the Unified Parkinson's Disease Rating Scale part III (UPDRS III), or with serum neurofilament light chain (NFL) measurements are shown.

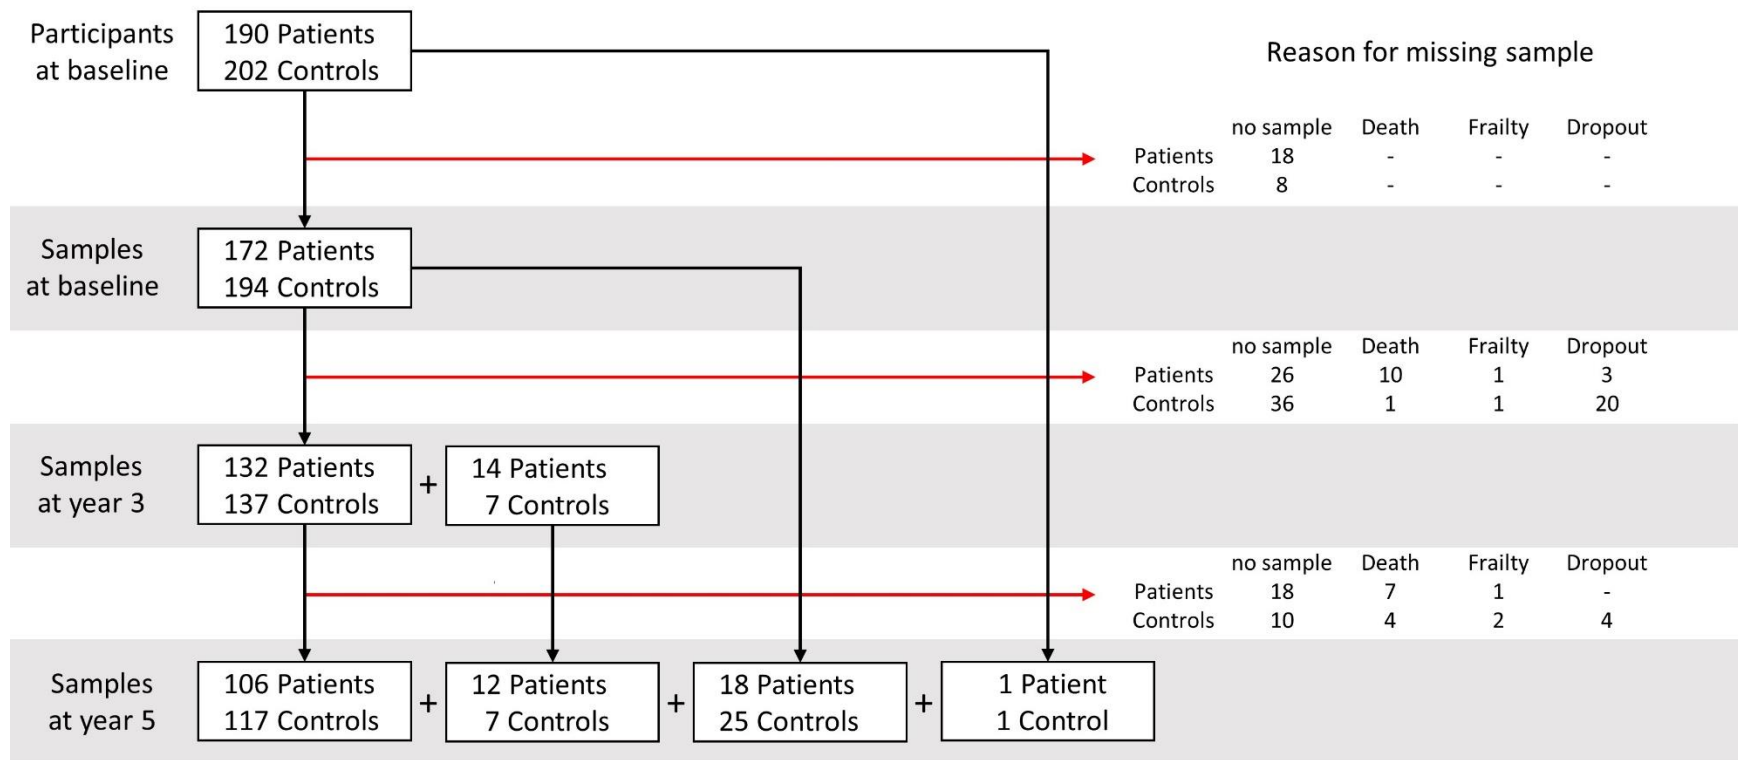

**Supplementary Figure 2.** Flowchart showing the availability of serum samples.

The number of participants eligible at baseline is shown, along with the number of serum samples available at each visit. The number of samples that are only available from baseline, year 3, or year 5 are indicated. Information regarding the reason for missing samples and the number of missing samples is provided on the right.

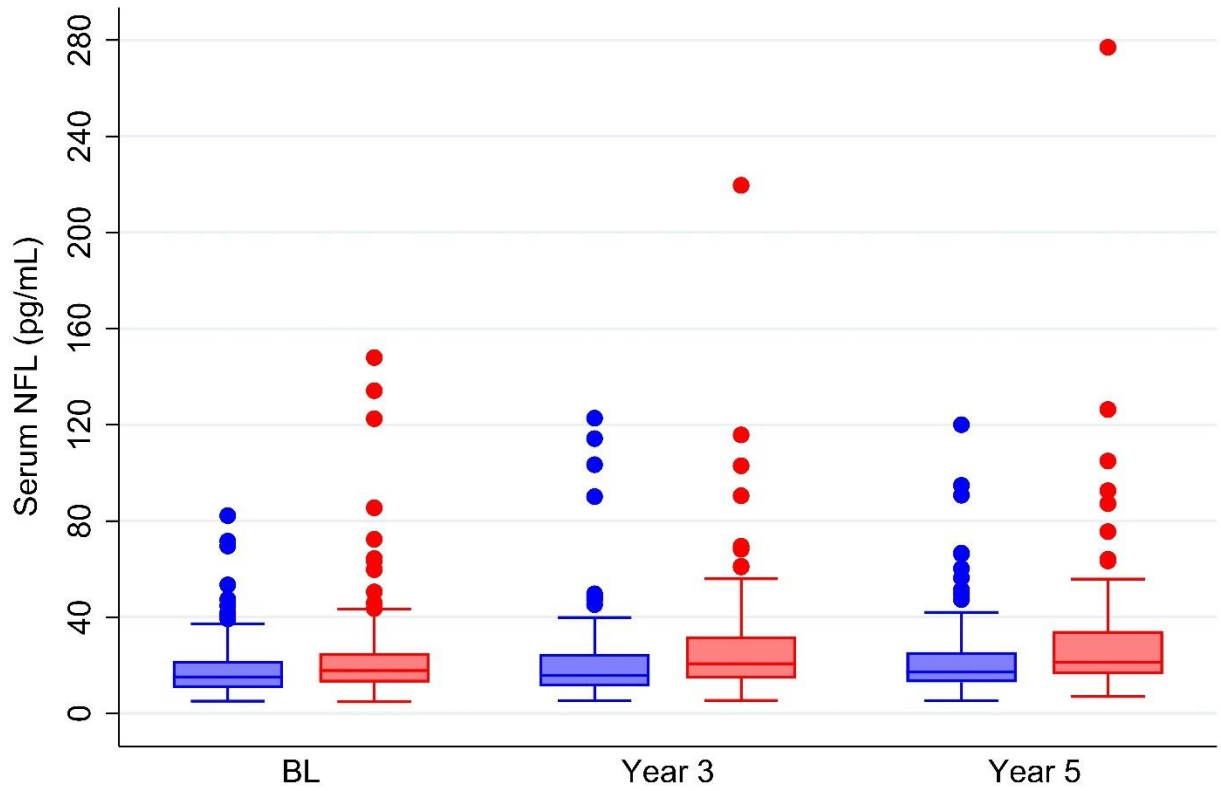

**Supplementary Figure 3.** Levels of serum NFL at baseline, year 3, and year 5 for controls (blue) and patients with PD (red). Outliers are represented by circles.

Abbreviations; NFL: Neurofilament light chain; BL: Baseline

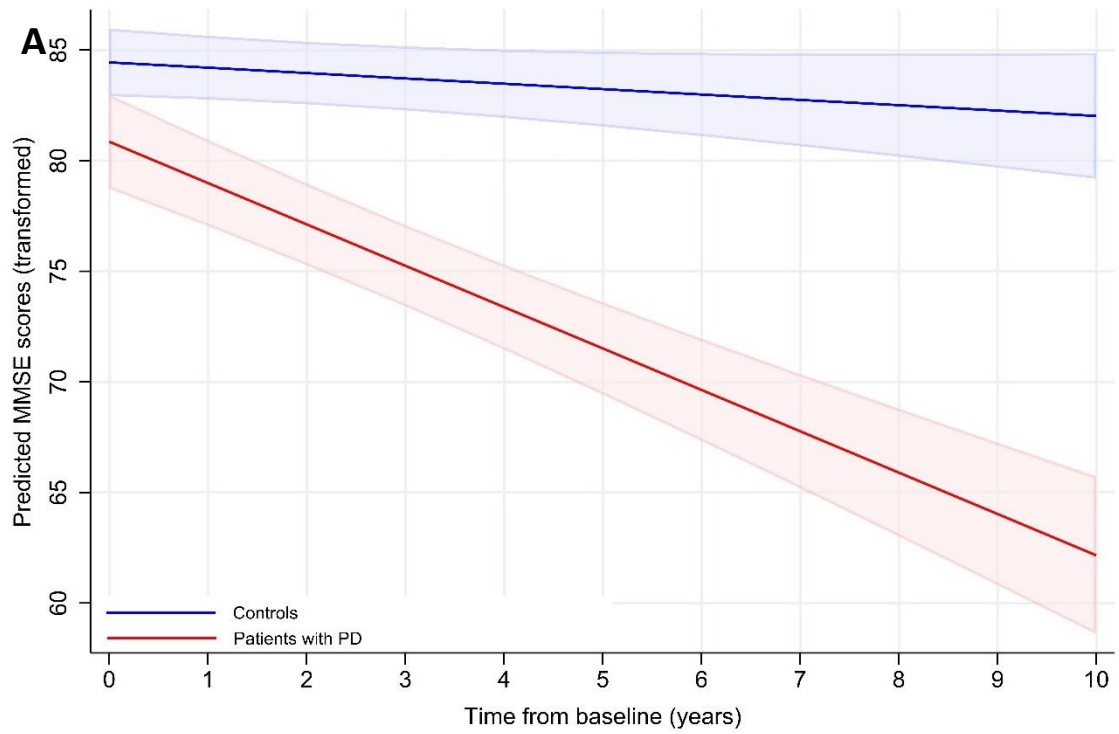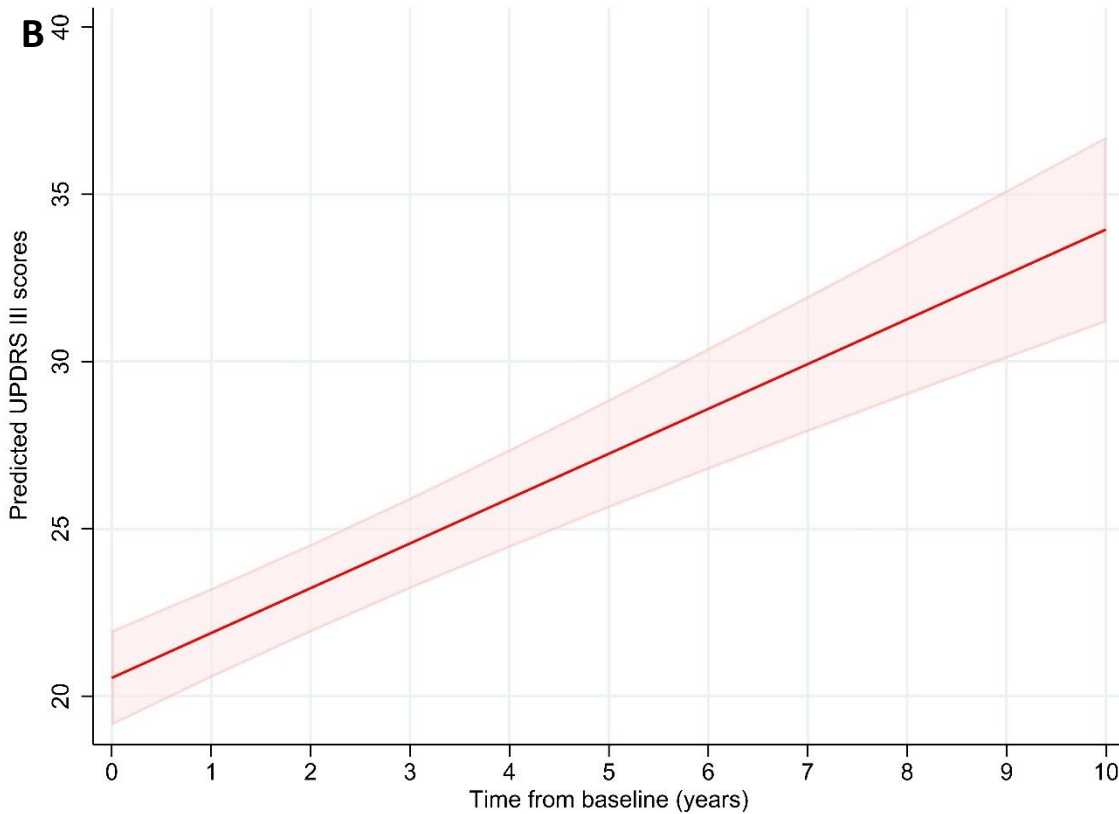

**Supplementary Figure 4.** Prediction of clinical scores over time. **(A)** Transformed Mini-Mental State Examination (MMSE) scores and **(B)** Unified Parkinson's Disease Rating Scale (UPDRS) III scores in controls (blue) and patients (red). MMSE scores were transformed before analysis, as described in the Methods.
